# Supplementary material for: Chemiresistive properties regulated by nanoscale curvature in molecularly-linked nanoparticle composite assembly
Source: Royal Society of Chemistry journal article supplement (doi:10.1039/c6nr09315a), 2017-01-01
Supplement: c6nr09315a1.pdf [file c6nr09315a1.pdf]

## Electronic Supplementary Information

### Change of Chemiresistive Properties Regulated by Nanoscale Curvature in Molecularly-Linked Nanoparticle Composite Assembly

Han-Wen Cheng<sup>a,b</sup>, Shan Yan<sup>b</sup>, Li Han<sup>b</sup>, Yong Chen<sup>a</sup>, Ning Kang<sup>b</sup>, Zakiya Skeete<sup>b</sup>, Jin Luo<sup>b</sup>, and Chuan-Jian Zhong<sup>b\*</sup>

<sup>a</sup> School of Chemical and Environmental Engineering, Shanghai Institute of Technology, Shanghai 201418, China

<sup>b</sup> Department of Chemistry, State University of New York at Binghamton, Binghamton, NY13902, USA

#### Additional Descriptions of Theoretical Considerations and Experimental Data:

**Estimation of the density of the nanocomposite:** The density of multi-walled carbon nanotubes (MWCNTs, diameter ~26 nm) (NanoLab) is about 1.3 g/cm<sup>3</sup>.<sup>52</sup> Consider a length of 10 nm CNT, the volume is 5309 nm<sup>3</sup>, the mass is 6.90 × 10<sup>-18</sup> g, and the total surface area of one CNT is 817 nm<sup>2</sup>. Consider gold nanoparticles of 2 nm core size capped with a full monolayer of decanethiolate (DT, molecular weight is 174.4 g/mol, length ~ 1.5 nm, diameter ~ 0.309 nm), the approximate projection area for one DT-Au<sub>nm</sub> would be 25 nm<sup>2</sup>. There would be ~132 DTs on one Au particle and ~33 (DT-Au<sub>nm</sub>) on each CNT. Consider the density of gold (19.3 g/cm<sup>3</sup>), the total mass of DT-Au<sub>nm</sub> + CNT, and the the total volume, the average density of (DT-Au<sub>nm</sub>)/CNT would be ~1.5 g/cm<sup>3</sup>.

**Table S1.** Average interparticle distances derived from analyses of the TEM data (Fig. 3).

| Assembly                   | diameter (nm) | Interparticle Distance ( <i>d</i> )         |                                         |
|----------------------------|---------------|---------------------------------------------|-----------------------------------------|
|                            |               | center-to-center <i>d<sub>cc</sub></i> (nm) | edge-to-edge <i>d<sub>ee</sub></i> (nm) |
| DT-Au <sub>nm</sub>        | 1.8 ± 0.2     | 3.6 (± 0.4)                                 | 1.8 (± 0.3)                             |
| NDT-Au <sub>nm</sub>       | 2.1 ± 0.4     | 3.6 (± 0.9)                                 | 1.5 (± 0.5)                             |
| NDT-Au <sub>nm</sub> /CNTs | 2.1 ± 0.3     | 5.0 (± 1.0)                                 | 2.9 (± 0.7)                             |

**Theoretical consideration of the electrical properties:** The ratio of resistances before and after the change in radius of curvature can be expressed by the following equation (equation 1),<sup>44</sup>

$$\frac{R_t}{R_i} = \exp[-\beta(d_1 - d_2)] \exp\left[\frac{0.5e^2}{4\pi\epsilon\epsilon_0RT} \left(\frac{1}{r+d_1} - \frac{1}{r+d_2}\right)\right] \quad (1a)$$

or in terms of relative resistance change,

$$\frac{R_t - R_i}{R_i} = \frac{\Delta R}{R_i} = \exp[-\beta(d_1 - d_2)] \exp\left[\frac{0.5e^2}{4\pi\epsilon\epsilon_0RT} \left(\frac{1}{r+d_1} - \frac{1}{r+d_2}\right)\right] - 1 \quad (1b)$$

where the resistance changes from  $R_i$  to  $R_t$  with interparticle distances change from  $d_1$  to  $d_2$ .  $\beta$  is the electron coupling term,  $r$  is the particle core radius,  $\epsilon$  is dielectric constant of interparticle medium, and other parameters include  $e = 1.6 \times 10^{-19}$  C,  $\epsilon_0 = 8.854 \times 10^{-12}$  F/m,  $R = 1.38 \times 10^{-23}$  J/K, and  $T = 300$  K. The  $R_t$  to  $R_i$  ratio contains two exponential components. The first component is mainly determined by the interparticle distance change and the  $\beta$  value (“ $\beta$ - $d$  term”), whereas the second component is largely dependent on the particle size, interparticle distance change, and  $\epsilon$  value (“ $\epsilon$ - $r$  term”).

Considering  $\Delta L/L = (d_2 - d_1)/(2r + d_1) = T_s/2R_b$ , where  $L$  represents the length of the device whereas  $\Delta L$  represents the change of the length upon strain. The corresponding interparticle edge-to-edge distances are  $d_1$  and  $d_2$ . For nanoparticle radius  $r = 1$  nm, interparticle edge-to-edge spacing  $d_1 = 1.6$  nm and  $\beta = 4.0$  nm<sup>-1</sup>,<sup>44</sup> the above two terms can be derived as a function of  $R_b$  based on a PET substrate of thickness  $T_s = 125$   $\mu$ m<sup>44</sup> and a CNT wall thickness  $T_s = 2$  nm (CNT: O.D.  $\times$  wall thickness  $\times L$ : (20-30 nm)  $\times$  (1-2 nm)  $\times$  (0.5-2  $\mu$ m)). Consider now the case of tensile strain, the radius of curvature for CNT would be 13 nm. Substituting these values into logarithm of equation-1, the two components can be expressed as a function of  $R_b$  ( $\mu$ m in the equations):

$$"\beta - d" \text{ term} : -\beta(d_1 - d_2) = \frac{900}{R_b} \text{ (for } T_s = 125 \mu\text{m)}, \text{ or } \frac{0.0144}{R_b} \text{ (for } T_s = 2 \text{ nm)} \quad (2a)$$

$$"\varepsilon - r" \text{ term} : \frac{0.5e^2}{4\pi\varepsilon\varepsilon_0RT} \left( \frac{1}{r + d_1} - \frac{1}{r + d_2} \right) = \frac{27.8 \text{ nm}}{\varepsilon} \times \left( \frac{1}{2.6} - \frac{1}{2.6 + \frac{225}{R_b}} \right) \quad (2b)$$

**Calculation of interparticle interaction potentials based on a dimer model:** For a symmetric dimer, the steric repulsive and van der Waals attractive interaction energies as a function of interparticle edge-to-edge distance ( $d_{ee}$ ) are given below:<sup>53,54</sup>

$$E_{steric, sym} \approx \frac{100R_1\delta_{bruth}^3}{d_{ee}\pi\sigma_{thiol}^3} kT \exp\left(\frac{-\pi d_{ee}}{\delta_{bruth}}\right) \quad (3)$$

$$E_{vdW, sym} = \frac{A}{12} \left[ \frac{4R_1^2}{(d_{ee} + 2R_1)^2 - 4R_1^2} + \frac{4R_1^2}{(d_{ee} + 2R_1)^2} + 2 \ln\left(\frac{(d_{ee} + 2R_1)^2 - 4R_1^2}{(d_{ee} + 2R_1)^2}\right) \right] \quad (4)$$

where  $R_1$  is particle radius;  $\delta$  and  $\sigma$  stand for the length and the diameter of a capping molecule on the nanoparticle surface.  $A$  is Hamaker constant.

For an asymmetric dimer, the van der Waals attractive interaction energy as a function of interparticle edge-to-edge distance ( $d_{ee}$ ) is given below:<sup>53,54</sup>

$$E_{vdW, asym} = \frac{A}{6} \left[ \frac{2R_1R_2}{(d_{ee} + R_1 + R_2)^2 - (R_1 + R_2)^2} + \frac{2R_1R_2}{(d_{ee} + R_1 + R_2)^2 - (R_1 - R_2)^2} + \ln\left(\frac{(d_{ee} + R_1 + R_2)^2 - (R_1 + R_2)^2}{(d_{ee} + R_1 + R_2)^2 - (R_1 - R_2)^2}\right) \right] \quad (5)$$

where  $R_1$  and  $R_2$  are particle radii;  $A$  is Hamaker constant.

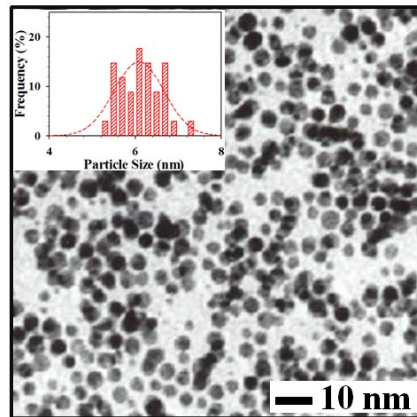

(a)

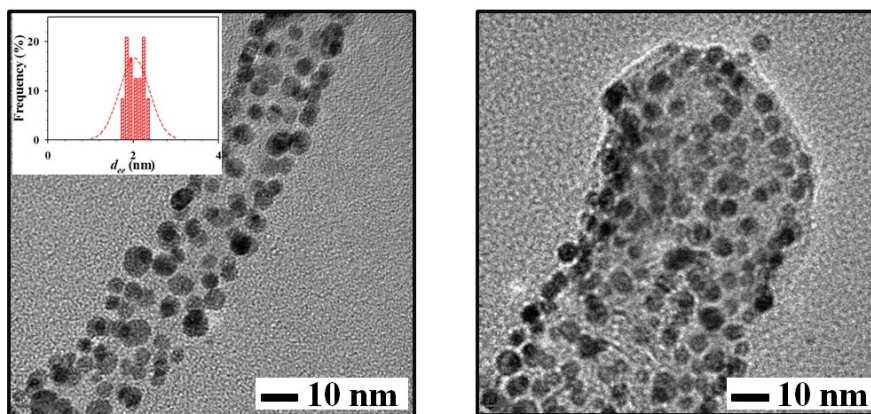

(b)

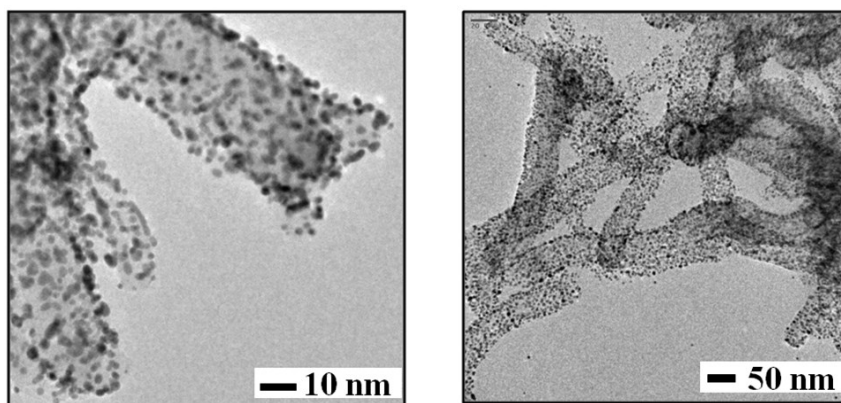

(c)

**Fig. S1.** TEM micrographs: (a) NDT-linked Au NPs ( $6.1 \pm 0.6$  nm) assembly on C film. (b-c) TEM micrographs for NDT-Au<sub>nm</sub> ( $6.0 \pm 0.9$  nm) on CNTs ( $d_{ee}$ ), and the average interparticle edge-to-edge distance ( $d_{ee}$ ) measured from image (b, left)  $\sim 2.0 \pm 0.5$  nm.

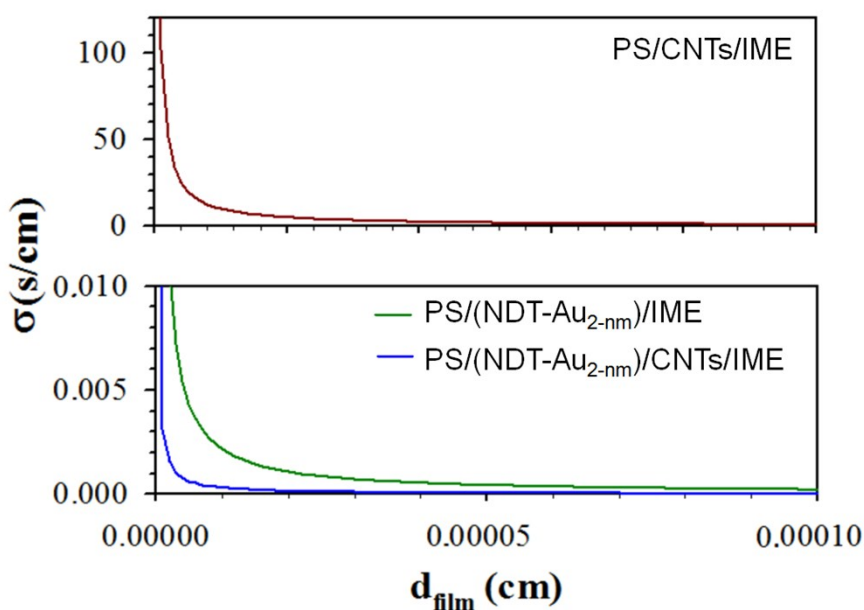

**Fig. S2.** Plots of the estimated electrical conductivity of the thin films on the IME device ( $\sigma = (1/R)(w/dl)$ ) ( $R$ : resistance ( $\Omega$ ),  $d$ : film thickness (cm),  $l$ : microelectrode length (50  $\mu\text{m}$ ), and  $w$ : gap of the microelectrodes (5  $\mu\text{m}$ )). Experimental resistances for thin films:  $9.8 (\pm 1.1) \times 10^2 \Omega$  (PS/CNTs/IME),  $4.6 (\pm 0.1) \times 10^6 \Omega$  (PS/(NDT-

$\text{Au}_{\text{nm}}/\text{IME}$ ), and  $3.2 (\pm 0.1) \times 10^7 \Omega$  (PS/(NDT- $\text{Au}_{\text{nm}}$ )/CNTs/IME).

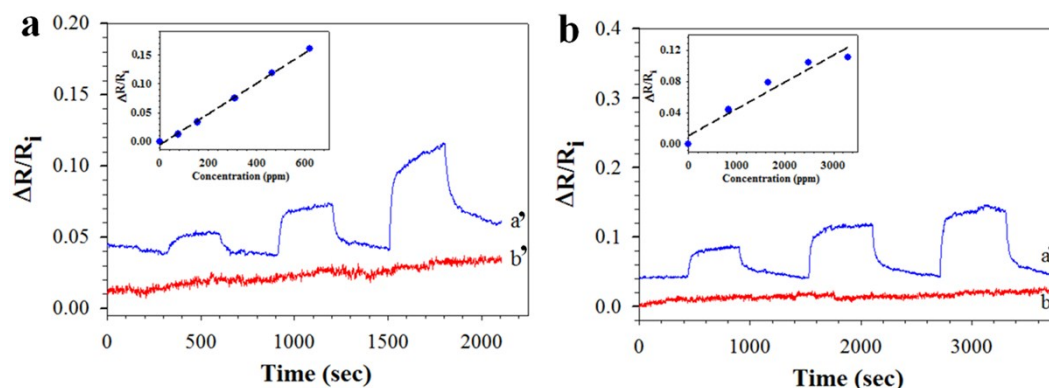

**Fig. S3.** (a) Response profiles of toluene (a) and hexane (b) vapors of increasing concentrations at: (NDT- $\text{Au}_{\text{nm}}/\text{CNTs}/\text{IME}$ ) (a') and at  $\text{CNTs}/\text{IME}$  (b'). Insert: a plot of the response vs. toluene concentration (ppm (M)) with linear regression slope:  $2.6 \times 10^{-4}$  (a) and  $3.4 \times 10^{-5}$  (b). (Estimated average 3x noise level: 0.0048).

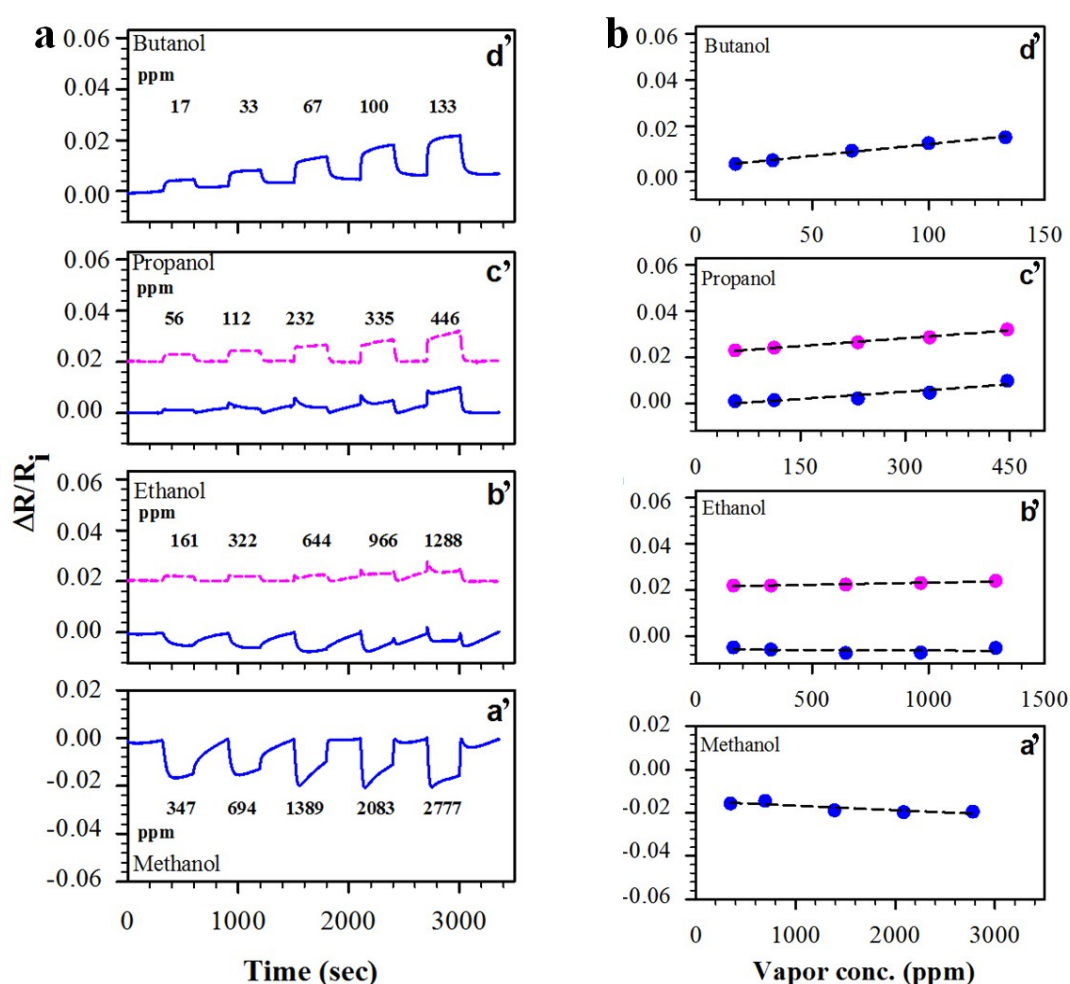

**Fig. S4.** (a) Response profiles of (NDT- $\text{Au}_{\text{nm}}/\text{IME}$ ) in response to different R-OH vapors (MeOH (a', vapor concentrations: 347, 694, 1389, 2083, 2777 (in ppm (M))), EtOH (b', vapor concentrations: 161, 322, 644, 966, 1288 (in ppm (M))), PrOH (c', vapor concentrations: 56, 112, 232, 335, 446 (in ppm (M))) and BuOH (d', vapor concentrations: 17, 33, 67, 100, 133 (in ppm (M))). (b) Plots of the response vs. concentration of different R-OH

vapors (ppm in moles per liter) at (NDT-Au<sub>nm</sub>)/CNTs/IME (linear regression slopes:  $-2.1 \times 10^{-6}$  (a');  $-4.6 \times 10^{-7}$  and  $1.8 \times 10^{-6}$  (b');  $2.1 \times 10^{-5}$  and  $2.3 \times 10^{-5}$  (c'), and  $1.0 \times 10^{-4}$  (d')). (Estimated average 3x noise level: 0.0006).

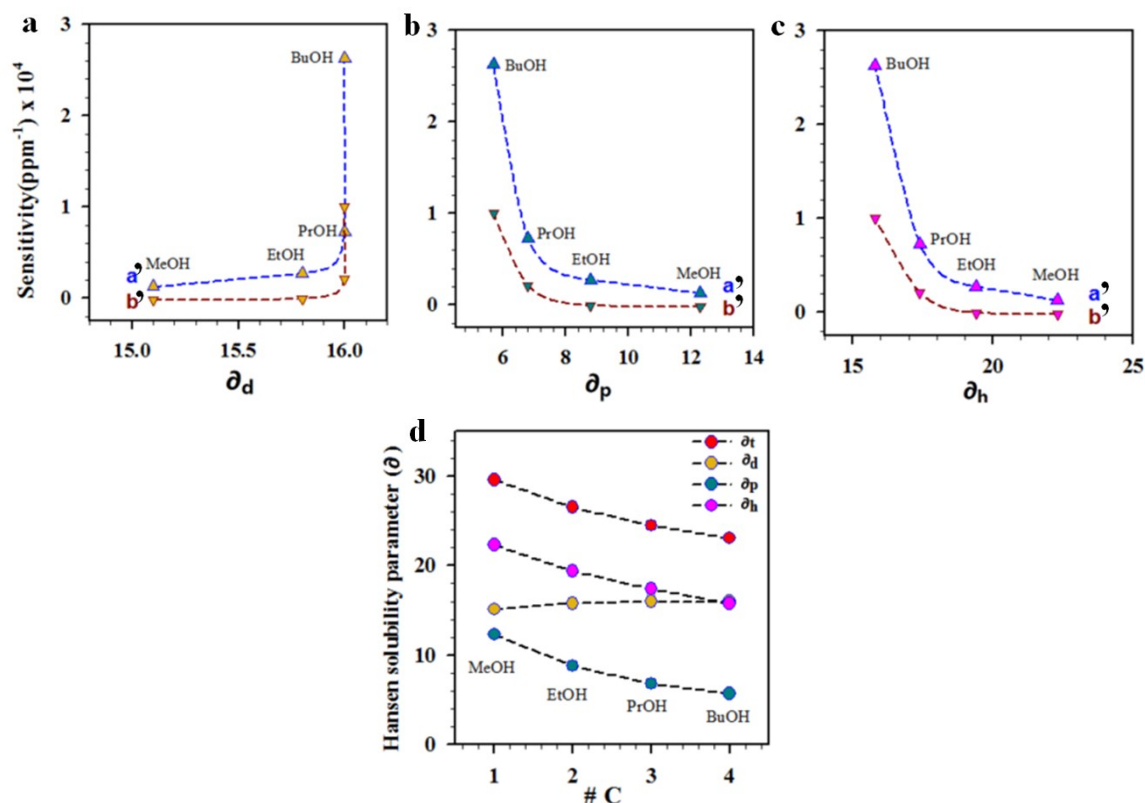

**Fig. S5.** (a-c) Plots of response sensitivities for a series of alcohol (R-OH) with (NDT-Au<sub>nm</sub>)/CNTs/IME (a', blue) and (NDT-Au<sub>nm</sub>)/IME (b', red) vs. the individual components in the solubility parameter ( $\partial_t = \sqrt{\partial_d^2 + \partial_p^2 + \partial_h^2}$ ) for the VOCs. (d) Solubility parameters vs. #C in the alcohol molecules.

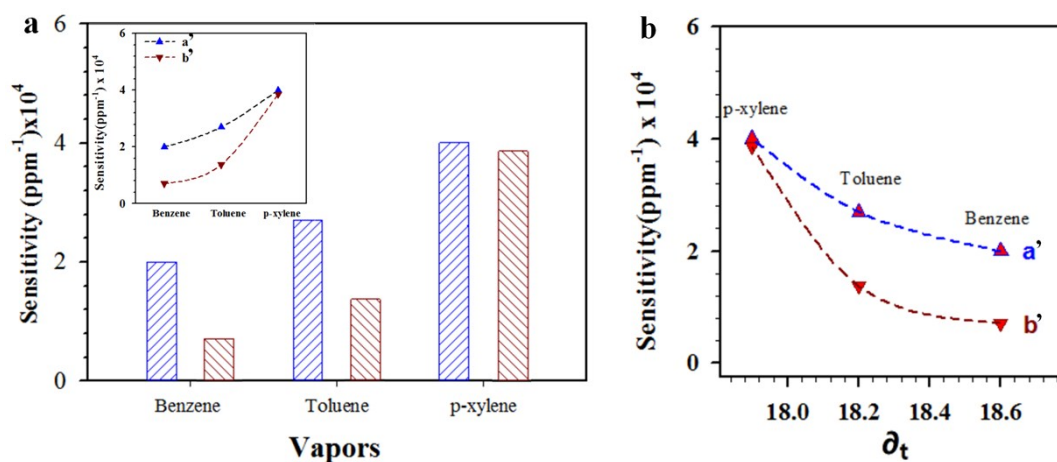

**Fig. S6.** (a) Comparison of response sensitivities for benzene, toluene, and p-xylene with (NDT-Au<sub>nm</sub>)/CNTs/IME (blue bars) and (NDT-Au<sub>nm</sub>)/IME (red bars). Inset: plots of the response sensitivity for the different vapor molecules ((a') (NDT-Au<sub>nm</sub>)/CNTs/IME); and (b') (NDT-Au<sub>nm</sub>)/IME). (b) Plots of the response sensitivity vs. total solubility parameter ((a') (NDT-Au<sub>nm</sub>)/CNTs/IME); and (b') (NDT-Au<sub>nm</sub>)/IME).

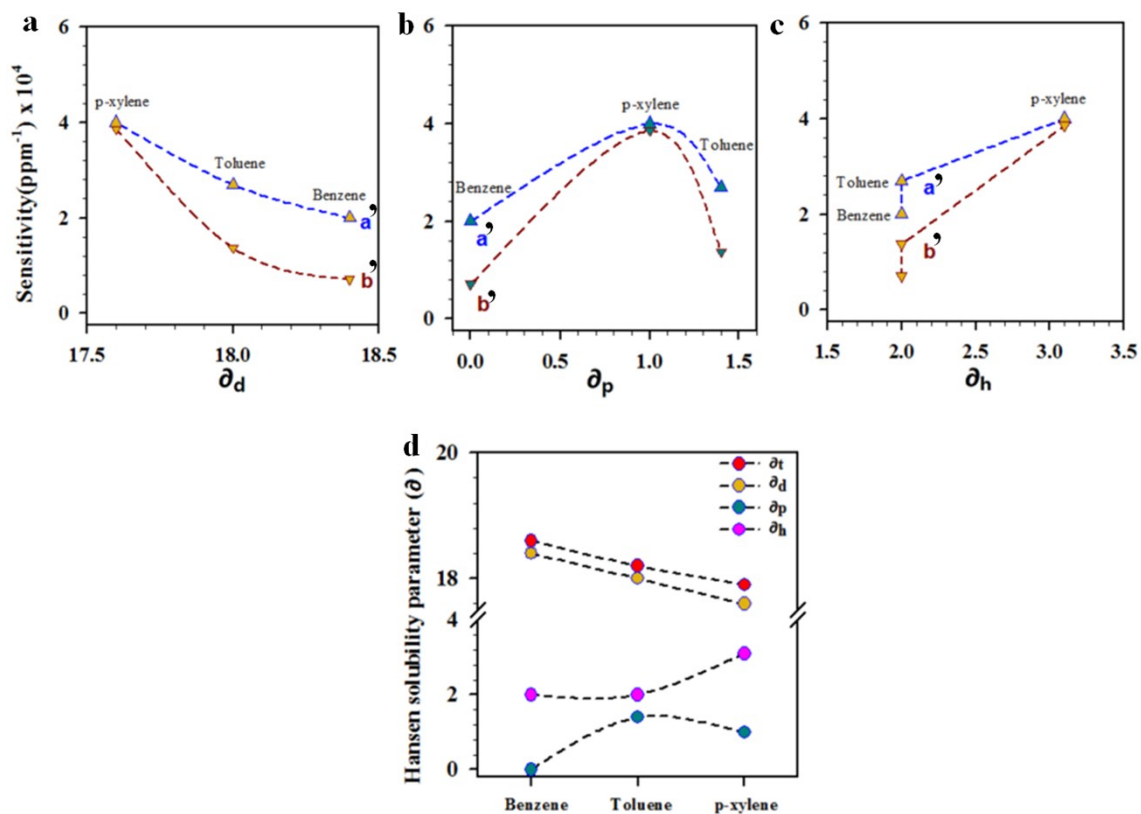

**Fig. S7.** (a-c) Plots of the response sensitivities for benzene, toluene and p-xylene vapors with (NDT-Au<sub>nm</sub>)/CNTs/IME (a', blue) and (NDT-Au<sub>nm</sub>)/IME (b', red) vs. the individual components in the solubility parameter ( $\partial_t = \sqrt{\partial_d^2 + \partial_p^2 + \partial_h^2}$ ) for the VOCs. (d) Solubility parameters for the three different VOC molecules.
